# Supplementary material for: The novel roles of virus infection-associated gene CDKN1A in chemoresistance and immune infiltration of glioblastoma
Source: PubMed Central journal article supplement (PMC7993694; doi:10.18632/aging.202519), 2021-02-17
Supplement: aging-13-202519-s001.pdf [file aging-13-202519-s001.pdf]

## SUPPLEMENTARY FIGURE

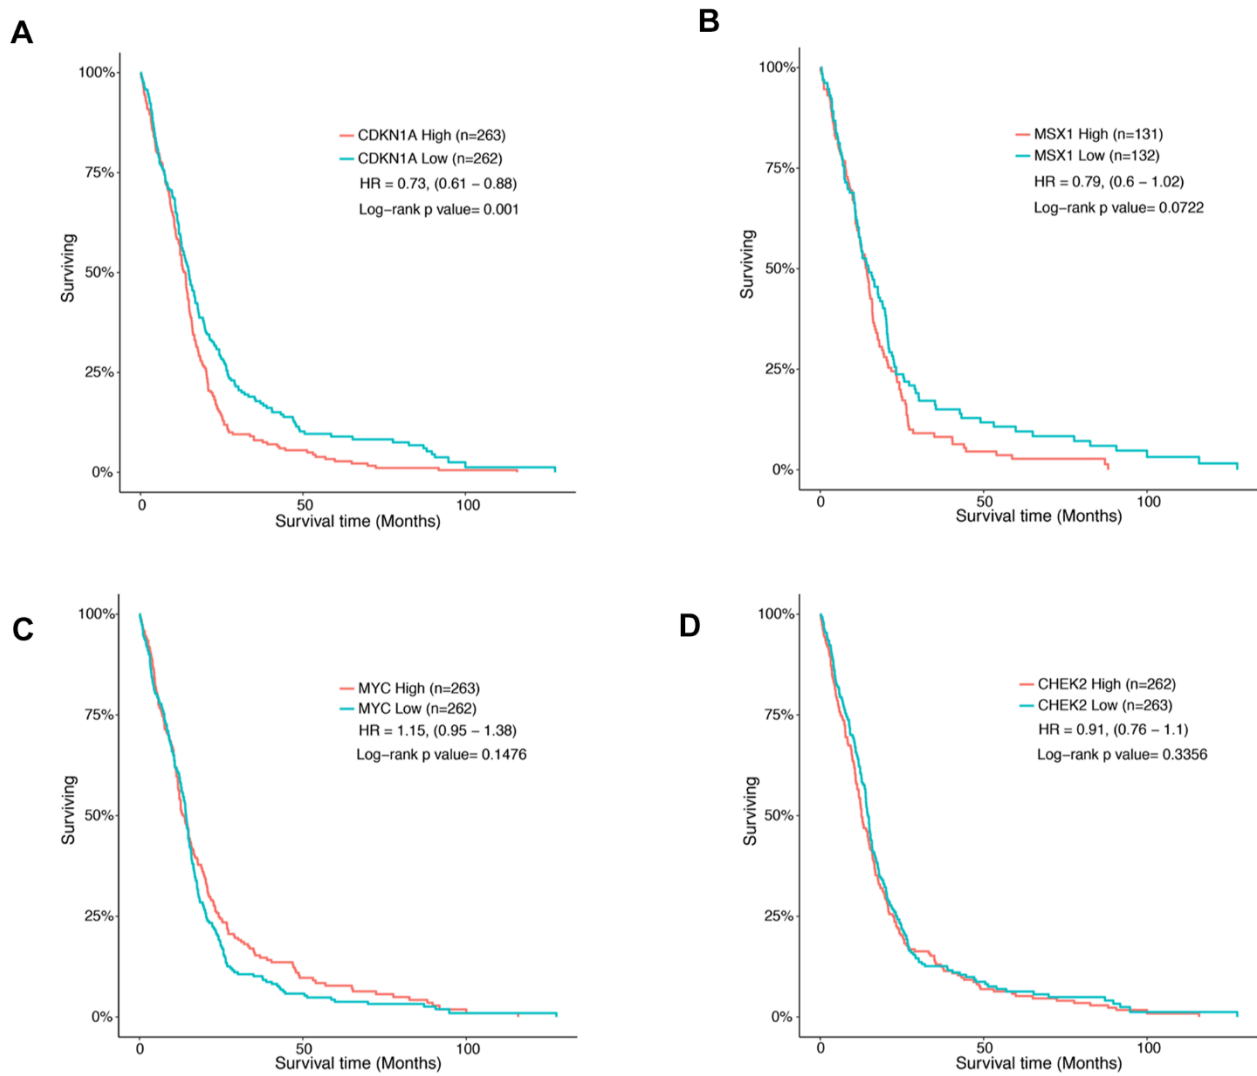

**Supplementary Figure 1. Prognostic values of CDKN1A, MSX1, MYC and CHEK2 in GBM.** (A–D) Kaplan-Meier analysis of overall survival among the samples with high expression levels of the four genes and those with low expression levels in GBM by using Gliovis database.
