# Supplementary material for: The novel roles of virus infection-associated gene CDKN1A in chemoresistance and immune infiltration of glioblastoma
Source: PubMed Central journal article supplement (PMC7993694; doi:10.18632/aging.202519), 2021-02-17
Supplement: aging-13-202519-s002.pdf [file aging-13-202519-s002.pdf]

## SUPPLEMENTARY TABLES

**Supplementary Table 1. The 74 co-differentially expressed genes (co-DEGs) in all three GEO datasets.**

|           |        |         |         |           |         |         |          |          |          |
|-----------|--------|---------|---------|-----------|---------|---------|----------|----------|----------|
| GDF15     | HSPA4L | CYP26B1 | DOCK7   | IRS1      | RRM2B   | CHEK2   | BOLA2    | GAB1     | SLC25A45 |
| CDKN1A    | ACTA2  | AEN     | TRIM22  | CYFIP2    | ERCC6L  | CA9     | CSF3     | NTPCR    | CDK5RAP2 |
| BTG2      | PLXNB2 | SNAI2   | SYNCRIP | TNFRSF10B | SPATA18 | TMEFF2  | SERPINE1 | BNIP3    | DUSP5    |
| HIST1H2BK | STOM   | FST     | UNG     | CYP1B1    | RBM4    | NRG1    | MYLK     | RALGDS   | GAS6     |
| SESN1     | SUGCT  | KIF2C   | DDIT4   | TIGAR     | MYC     | COL12A1 | PLOD2    | C10orf88 | ARPP21   |
| DDB2      | IP6K2  | ZMAT3   | CDH4    | TIMELESS  | MCL1    | ZNF337  | TNFRSF14 | GPER1    | SGK223   |
| TP53INP1  | XPC    | SOCS3   | SDC1    | FAM111A   | CMBL    | CBLL1   | MSMO1    | PTPRR    | NHS      |
| CBX4      | AHNAK  | MSX1    | PARVB   |           |         |         |          |          |          |

**Supplementary Table 2. The Genes in the Human T-cell leukemia virus 1 infection.**

|         |           |          |          |          |          |          |          |          |          |
|---------|-----------|----------|----------|----------|----------|----------|----------|----------|----------|
| AKT3    | CDK2      | CDK4     | CDKN1A   | CDKN2A   | CDKN2B   | CDKN2C   | ANAPC10  | CREB3    | KAT5     |
| ADCY2   | ADCY3     | ADCY5    | CHEK1    | ADCY6    | CHEK2    | ADCY7    | ADCY8    | CHUK     | ADCY9    |
| ATF2    | CREBBP    | ATF6B    | CSF2     | CREB3L4  | DLG1     | E2F1     | E2F2     | E2F3     | EGR1     |
| CRTC2   | ELK1      | ELK4     | EP300    | AKT1     | AKT2     | ETS1     | ETS2     | FDPS     | CRTC1    |
| KAT2A   | GPS2      | SLC25A4  | SLC25A5  | SLC25A6  | ANAPC2   | ANAPC4   | HLA-A    | HLA-B    | HLA-C    |
| HLA-DOA | HLA-DOB   | HLA-DPA1 | HLA-DPB1 | HLA-DQA1 | HLA-DQA2 | HLA-DQB1 | HLA-DRA  | HLA-DRB1 | HLA-DRB3 |
| HLA-E   | HLA-F     | HLA-G    | HRAS     | XIAP     | ICAM1    | IKBKB    | IL1R1    | IL2      | IL2RA    |
| IL6     | IL15      | IL15RA   | ITGAL    | ITGB2    | JAK1     | JAK3     | JUN      | KRAS     | TBPL2    |
| LTBR    | MAD2L1    | SMAD2    | SMAD3    | SMAD4    | MAP3K1   | MAP3K3   | MMP7     | MSX1     | MSX2     |
| ATM     | NFATC1    | NFATC2   | NFATC3   | NFATC4   | NFKB1    | NFKB2    | NFKBIA   | NFYB     | NRAS     |
| ANAPC11 | PIK3CA    | PIK3CB   | PIK3CD   | PIK3R1   | PIK3R2   | POLB     | ATR      | PPP3CA   | PPP3CB   |
| PPP3R2  | PRKACA    | PRKACB   | PRKACG   | VAC14    | MAPK1    | MAPK3    | MAPK8    | MAPK9    | MAPK10   |
| B2M     | PTEN      | BAX      | RAN      | RANBP1   | RB1      | CCND1    | RELA     | RELB     | BCL2L1   |
| CREB3L2 | CRTC3     | SLC2A1   | SPI1     | SRF      | STAT5A   | STAT5B   | TBP      | TCF3     | BUB1B    |
| TGFB2   | TGFB3     | TGFBR1   | TGFBR2   | TSPO     | TLN1     | TNF      | TNFRSF1A | TP53     | VDAC1    |
| XPO1    | ZFP36     | IL1R2    | FOSL1    | CALR     | CANX     | TRRAP    | SLC25A31 | TLN2     | MAD1L1   |
| PIK3R3  | IKBKG     | CDC23    | NRP1     | KAT2B    | CDC16    | CCNA2    | CCNA1    | CCND2    | CCND3    |
| CREB3L1 | CCNB2     | CCNE2    | CD3D     | CD3E     | CD3G     | BUB3     | CD4      | PTTG1    | TBPL1    |
| ESPL1   | CDC20     | CDC27    | MAP2K2   | ANAPC1   | TGFB1    | VDAC3    | RANBP3   | MAP3K14  | CREB5    |
| ADCY1   | TNFRSF13C | EGR2     | FOS      | HLA-DMA  | HLA-DRB4 | IL2RB    | LCK      | MYC      | ANAPC5   |
| PPP3CC  | MAP2K1    | MAP2K4   | TERT     | VDAC2    | CREB3L3  | CCNE1    | CD40     | PPP3R1   | ANAPC7   |
| PTTG2   | CREB1     | ADCY4    | CDC26    | HLA-DMB  | HLA-DRB5 | IL2RG    | LTA      | ATF4     |          |

**Supplementary Table 3. The 99 differentially expressed genes that interact with CDKN1A from Gliovis database.**

|        |          |          |          |          |         |        |         |           |        |
|--------|----------|----------|----------|----------|---------|--------|---------|-----------|--------|
| CHI3L1 | SERPINE1 | TIMP1    | IL8      | CHL1     | EFEMP2  | ANXA2  | HRH1    | LOXL1     | INA    |
| PTX3   | FCGBP    | TNFAIP6  | ABCC3    | DDB2     | SOD2    | FCGR2B | S100A10 | C5AR1     | SH3GL2 |
| LTF    | EMP3     | C21orf62 | IGFBP2   | SERPINA1 | ANXA1   | ARSJ   | PIPOX   | EMP1      | FGF13  |
| CDKN1A | CA12     | DPYD     | NAMPT    | STEAP3   | NR2E1   | MAOB   | PTRF    | ANXA2P2   | FERMT1 |
| CXCL14 | NNMT     | MOXD1    | DIRAS3   | CD44     | TREM1   | FZD7   | S100A8  | PLTP      | SNAP91 |
| CHI3L2 | PLA2G2A  | OXTR     | CLEC5A   | TAGLN    | LIF     | PYGL   | WWTR1   | KIAA0226L | CD24   |
| PLA2G5 | F13A1    | SERPINA3 | EFEMP1   | HAMP     | SCG2    | CSTA   | FAM129A | VSIG4     | DCX    |
| PDPN   | ADM      | SRPX     | SERPING1 | ANGPTL4  | C1S     | RNASE2 | COL5A1  | PLAU      | LPPR1  |
| CCL2   | CD163    | C1R      | IGFBP3   | POSTN    | PLAUR   | C1RL   | FABP7   | CA10      | TOX3   |
| LOX    | LGALS3   | CFI      | TRIM22   | ACSS3    | ALOX5AP | TGFBI  | UPP1    | DLL3      |        |
