# Supplementary material for: The novel roles of virus infection-associated gene CDKN1A in chemoresistance and immune infiltration of glioblastoma
Source: Aging (Albany NY). 2021 Feb 17;13(5):6662–80. doi: 10.18632/aging.202519 (PMC7993694; doi:10.18632/aging.202519)
Supplement: Supplementary Table 4 [file aging-13-202519-s003.xlsx]

## Sheet: CellMinerCDB - CDKN1A-TMZ
Supplementary Table 4. The correlation of CDKN1A expression and TMZ activity.
Cell Line	expCDKN1A	TMZ activity	tissues	OncoTree1	OncoTree2	OncoTree3	OncoTree4	EMT
42-MG-BA	7.69397	3.86993	GBM	Brain_CNS	Diffuse Glioma (DIFG)	Astrocytoma (ASTR)	NA	Mesenchymal
8-MG-BA	8.4731	4.30666	GBM	Brain_CNS	Diffuse Glioma (DIFG)	Astrocytoma (ASTR)	NA	Mesenchymal
A172	9.30703	3.85295	GBM	Brain_CNS	Diffuse Glioma (DIFG)	Astrocytoma (ASTR)	NA	Mesenchymal
ACN	4.38926	3.76456	NA	Brain_CNS	Embryonal Tumor (EMBT)	Neuroblastoma (NBL)	NA	Mesenchymal
AM-38	8.86113	3.57171	GBM	Brain_CNS	Diffuse Glioma (DIFG)	Astrocytoma (ASTR)	NA	Mesenchymal
BE2-M17	4.82892	3.11526	OTHER	Brain_CNS	NA	NA	NA	Mesenchymal
Becker	5.4259	3.68734	GBM	Brain_CNS	Diffuse Glioma (DIFG)	Astrocytoma (ASTR)	NA	Mesenchymal
CAS-1	6.18195	3.11394	GBM	Brain_CNS	Diffuse Glioma (DIFG)	Astrocytoma (ASTR)	NA	Mesenchymal
CCF-STTG1	8.89477	3.43521	NA	Brain_CNS	Diffuse Glioma (DIFG)	Astrocytoma (ASTR)	NA	Mesenchymal
CHP-126	6.85799	4.41179	NA	Brain_CNS	Embryonal Tumor (EMBT)	Neuroblastoma (NBL)	NA	Epithelial-Mesenchymal
CHP-212	7.32949	4.00171	NA	Brain_CNS	Embryonal Tumor (EMBT)	Neuroblastoma (NBL)	NA	Mesenchymal
D-247MG	9.02459	3.20123	GBM	Brain_CNS	NA	NA	NA	Mesenchymal
D-263MG	6.3311	3.41244	GBM	Brain_CNS	NA	NA	NA	Mesenchymal
D-283MED	10.7791	3.52234	OTHER	Brain_CNS	Embryonal Tumor (EMBT)	Medulloblastoma (MBL)	NA	Mesenchymal
D-336MG	6.6077	3.28999	OTHER	Brain_CNS	NA	NA	NA	Mesenchymal
D-392MG	10.2866	3.20474	GBM	Brain_CNS	NA	NA	NA	Mesenchymal
D-423MG	6.82671	4.45712	GBM	Brain_CNS	NA	NA	NA	Mesenchymal
D-502MG	9.30069	3.0118	OTHER	Brain_CNS	NA	NA	NA	Mesenchymal
D-542MG	7.58967	3.20982	GBM	Brain_CNS	NA	NA	NA	Mesenchymal
D-566MG	5.86447	3.971	GBM	Brain_CNS	NA	NA	NA	Mesenchymal
Daoy	7.77163	3.72024	OTHER	Brain_CNS	Embryonal Tumor (EMBT)	Medulloblastoma (MBL)	NA	Mesenchymal
DBTRG-05MG	9.83207	3.30902	GBM	Brain_CNS	Diffuse Glioma (DIFG)	Astrocytoma (ASTR)	NA	Mesenchymal
DK-MG	9.97525	3.17567	GBM	Brain_CNS	Diffuse Glioma (DIFG)	Astrocytoma (ASTR)	NA	Mesenchymal
GAMG	6.89237	3.50399	CANNOT_CLASSIFY	Brain_CNS	NA	NA	NA	Mesenchymal
GB-1	7.39879	3.77271	GBM	Brain_CNS	Diffuse Glioma (DIFG)	Astrocytoma (ASTR)	NA	Mesenchymal
GI-1	4.93904	4.36941	OTHER	Brain_CNS	Diffuse Glioma (DIFG)	Glioblastoma (GB)	Gliosarcoma (GSARC)	Mesenchymal
GI-ME-N	9.63431	4.32005	NA	Brain_CNS	Embryonal Tumor (EMBT)	Neuroblastoma (NBL)	NA	Mesenchymal
GOTO	8.98034	3.39047	NA	Brain_CNS	Embryonal Tumor (EMBT)	Neuroblastoma (NBL)	NA	Mesenchymal
H4	9.51834	3.64217	CANNOT_CLASSIFY	Brain_CNS	NA	NA	NA	Mesenchymal
Hs-683	6.1617	3.44419	CANNOT_CLASSIFY	Brain_CNS	NA	NA	NA	Mesenchymal
IMR-5	7.10211	3.97012	NA	Brain_CNS	Embryonal Tumor (EMBT)	Neuroblastoma (NBL)	NA	Mesenchymal
KALS-1	8.4304	3.40278	CANNOT_CLASSIFY	Brain_CNS	NA	NA	NA	Mesenchymal
KELLY	7.91783	3.55109	OTHER	Brain_CNS	Embryonal Tumor (EMBT)	Neuroblastoma (NBL)	NA	Mesenchymal
KINGS-1	7.49176	3.35579	OTHER	Brain_CNS	NA	NA	NA	Mesenchymal
KNS-42	5.23295	3.569	CANNOT_CLASSIFY	Brain_CNS	NA	NA	NA	Mesenchymal
KNS-81-FD	9.94584	3.151	CANNOT_CLASSIFY	Brain_CNS	Diffuse Glioma (DIFG)	Astrocytoma (ASTR)	NA	Mesenchymal
KP-N-YN	6.89158	3.23806	NA	Brain_CNS	Embryonal Tumor (EMBT)	Neuroblastoma (NBL)	NA	Mesenchymal
KS-1	10.5723	3.83599	GBM	Brain_CNS	Diffuse Glioma (DIFG)	Astrocytoma (ASTR)	NA	Mesenchymal
LAN-6	9.66292	3.21855	NA	Brain_CNS	Embryonal Tumor (EMBT)	Neuroblastoma (NBL)	NA	Epithelial-Mesenchymal
LN-18	6.4958	3.6279	GBM	Brain_CNS	Diffuse Glioma (DIFG)	Astrocytoma (ASTR)	NA	Mesenchymal
LN-229	8.13125	3.90989	GBM	Brain_CNS	Diffuse Glioma (DIFG)	Astrocytoma (ASTR)	NA	Mesenchymal
LN-405	6.7748	3.13649	GBM	Brain_CNS	NA	NA	NA	Mesenchymal
LNZTA3WT4	8.03603	4.06969	GBM	Brain_CNS	NA	NA	NA	Mesenchymal
M059J	6.39405	3.90939	GBM	Brain_CNS	NA	NA	NA	Mesenchymal
MOG-G-CCM	7.02705	3.34466	OTHER	Brain_CNS	Diffuse Glioma (DIFG)	Astrocytoma (ASTR)	NA	Mesenchymal
MOG-G-UVW	6.41698	4.22309	OTHER	Brain_CNS	Diffuse Glioma (DIFG)	Astrocytoma (ASTR)	NA	Mesenchymal
NB1	8.96261	3.3842	NA	Brain_CNS	Embryonal Tumor (EMBT)	Neuroblastoma (NBL)	NA	Mesenchymal
NB10	9.57897	3.84469	NA	Brain_CNS	Embryonal Tumor (EMBT)	Neuroblastoma (NBL)	NA	Mesenchymal
NB12	9.67628	3.7802	NA	Brain_CNS	Embryonal Tumor (EMBT)	Neuroblastoma (NBL)	NA	Mesenchymal
NB13	4.09281	3.55425	NA	Brain_CNS	Embryonal Tumor (EMBT)	Neuroblastoma (NBL)	NA	Mesenchymal
NB14	7.38014	3.53384	NA	Brain_CNS	Embryonal Tumor (EMBT)	Neuroblastoma (NBL)	NA	Mesenchymal
NB17	8.06218	3.26002	NA	Brain_CNS	Embryonal Tumor (EMBT)	Neuroblastoma (NBL)	NA	Mesenchymal
NB5	6.18933	3.46497	NA	Brain_CNS	Embryonal Tumor (EMBT)	Neuroblastoma (NBL)	NA	Mesenchymal
NB7	5.05081	3.55981	NA	Brain_CNS	Embryonal Tumor (EMBT)	Neuroblastoma (NBL)	NA	Epithelial-Mesenchymal
NBsusSR	4.27899	3.6777	NA	Brain_CNS	Embryonal Tumor (EMBT)	Neuroblastoma (NBL)	NA	Mesenchymal
NMC-G1	10.6643	3.48279	CANNOT_CLASSIFY	Brain_CNS	NA	NA	NA	Mesenchymal
no-10	7.23297	3.41845	OTHER	Brain_CNS	NA	NA	NA	Mesenchymal
no-11	9.19138	3.18422	OTHER	Brain_CNS	NA	NA	NA	Mesenchymal
ONS-76	8.94906	3.44344	OTHER	Brain_CNS	Embryonal Tumor (EMBT)	Medulloblastoma (MBL)	NA	Mesenchymal
SF126	7.02161	3.55205	GBM	Brain_CNS	Diffuse Glioma (DIFG)	Astrocytoma (ASTR)	NA	Mesenchymal
SF268	5.7523	3.79709	GBM	Brain_CNS	NA	NA	NA	Mesenchymal
SF295	7.77785	3.71889	GBM	Brain_CNS	Diffuse Glioma (DIFG)	Astrocytoma (ASTR)	NA	Mesenchymal
SF539	7.37826	4.02633	OTHER	Brain_CNS	NA	NA	NA	Mesenchymal
SIMA	9.63957	3.33392	NA	Brain_CNS	Embryonal Tumor (EMBT)	Neuroblastoma (NBL)	NA	Mesenchymal
SK-MG-1	7.32938	3.57149	GBM	Brain_CNS	NA	NA	NA	Mesenchymal
SK-N-AS	6.21625	3.29502	NA	Brain_CNS	Embryonal Tumor (EMBT)	Neuroblastoma (NBL)	NA	Mesenchymal
SK-N-DZ	4.42866	3.44497	NA	Brain_CNS	Embryonal Tumor (EMBT)	Neuroblastoma (NBL)	NA	Mesenchymal
SK-N-FI	7.35697	3.65501	NA	Brain_CNS	Embryonal Tumor (EMBT)	Neuroblastoma (NBL)	NA	Mesenchymal
SK-N-SH	9.83772	3.555	OTHER	Brain_CNS	Embryonal Tumor (EMBT)	Neuroblastoma (NBL)	NA	Mesenchymal
SNB75	7.44814	3.10813	GBM	Brain_CNS	NA	NA	NA	Mesenchymal
SW1088	5.73949	3.74711	GBM	Brain_CNS	NA	NA	NA	Mesenchymal
SW1783	7.01001	3.58016	OTHER	Brain_CNS	Diffuse Glioma (DIFG)	Astrocytoma (ASTR)	NA	Mesenchymal
T98G	6.43598	3.67374	GBM	Brain_CNS	Diffuse Glioma (DIFG)	Astrocytoma (ASTR)	NA	Mesenchymal
TGW	3.83712	3.80567	NA	Brain_CNS	Embryonal Tumor (EMBT)	Neuroblastoma (NBL)	NA	Mesenchymal
U-118-MG	8.27041	3.09864	GBM	Brain_CNS	Diffuse Glioma (DIFG)	Astrocytoma (ASTR)	NA	Mesenchymal
U-87-MG	10.0846	3.09872	GBM	Brain_CNS	Diffuse Glioma (DIFG)	Astrocytoma (ASTR)	NA	Mesenchymal
U251	6.30793	4.10723	GBM	Brain_CNS	Diffuse Glioma (DIFG)	Astrocytoma (ASTR)	NA	Mesenchymal
YH-13	7.34074	3.41699	GBM	Brain_CNS	Diffuse Glioma (DIFG)	Astrocytoma (ASTR)	NA	Mesenchymal
YKG-1	7.02067	3.41674	GBM	Brain_CNS	Diffuse Glioma (DIFG)	Astrocytoma (ASTR)	NA	Mesenchymal
